# Supplementary material for: Crafting a Personalized Prognostic Model for Malignant Prostate Cancer Patients Using Risk Gene Signatures Discovered through TCGA-PRAD Mining, Machine Learning, and Single-Cell RNA-Sequencing
Source: MDPI journal article supplement (doi:10.3390/diagnostics13121997), 2023-06-07
Supplement: s1 [file s1]

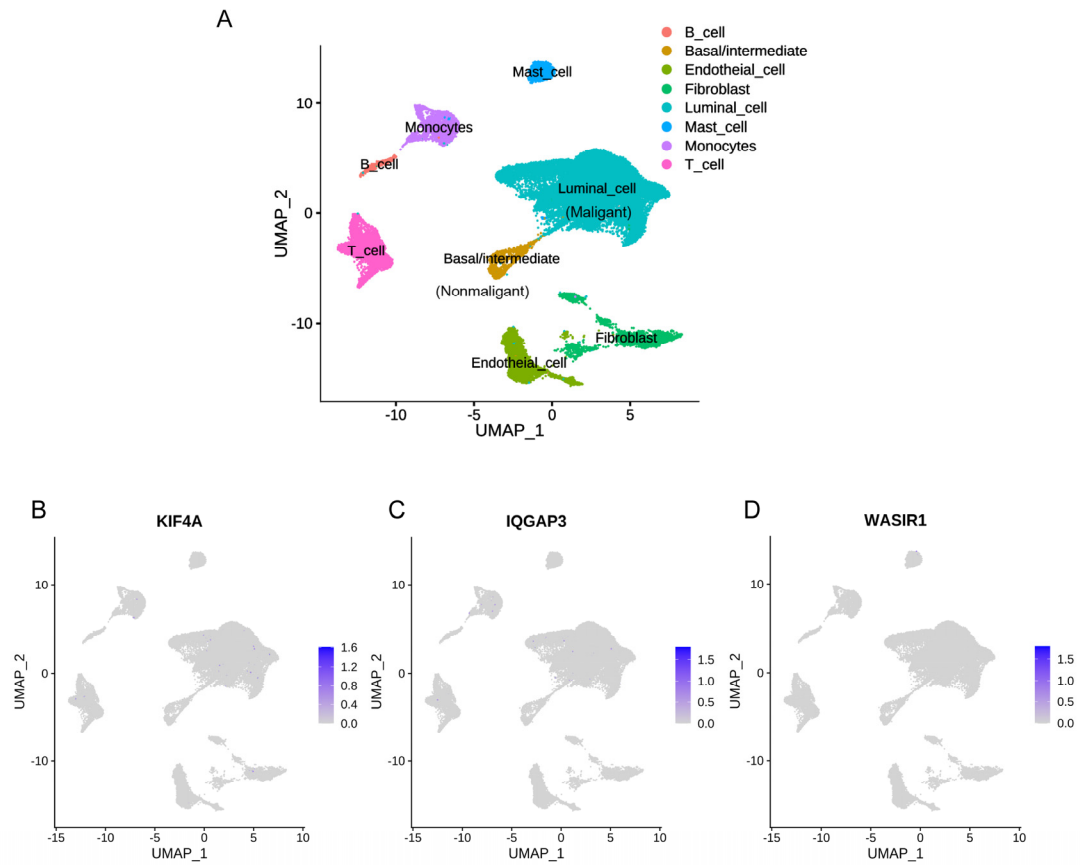

**Figure S1.** Expression analysis of 5 risk factors in cellular subgroups of prostate cancer. (A) The annotation of cell subpopulations. Analysis of the expression of KIF4A (B), IQGAP3 (C), and WASIR1 (D) in cellular subgroups using the GSE 141445 dataset.
