# Supplementary material for: Crafting a Personalized Prognostic Model for Malignant Prostate Cancer Patients Using Risk Gene Signatures Discovered through TCGA-PRAD Mining, Machine Learning, and Single-Cell RNA-Sequencing
Source: MDPI journal article supplement (doi:10.3390/diagnostics13121997), 2023-06-07
Supplement: s1 [file s1]

**Table S2.** Primer Sequences used for Real-time PCR

| Primer     | Sequence (5'→ 3')        |
|------------|--------------------------|
| WASIR1-F   | ATTCTCCACGGCTGCCATTA     |
| WASIR1-R   | AAACTCCGTCCTCACAGTCC     |
| KRTAP5-1-F | TGCCCCGTGTGTTGCTGTTCCCTG |
| KRTAP5-1-R | ATGACCCACAGCCTGAGGAACA   |
| TLX1-F     | GGTCAAAACCTGGTTCCAGAACC  |
| TLX1-R     | TGTGCCAGGCTCTTCTGGAAGG   |
| IQGAP3-F   | GTTCCGGCAGAAGTTTGCTGAGC  |
| IQGAP3-R   | CACTCCAGGTAAATCTTCCGCTG  |
| U6-F       | CTCGCTTCGGCAGCACATATACT  |
| U6-R       | CGCTTCACGAATTTGCGTGT     |
| RPL19-F    | AAGCCTGTGACGGTCCATTC     |
| RPL19-R    | TGGCTGTACCCTTCCGCTTA     |
