# Supplementary material for: Crafting a Personalized Prognostic Model for Malignant Prostate Cancer Patients Using Risk Gene Signatures Discovered through TCGA-PRAD Mining, Machine Learning, and Single-Cell RNA-Sequencing
Source: MDPI journal article supplement (doi:10.3390/diagnostics13121997), 2023-06-07
Supplement: s1 [file s1]

**Table S1.** Clinical Information of PCa Patients in TCGA-PRAD

| Characteristic                 | levels                       | Overall          |
|--------------------------------|------------------------------|------------------|
| n                              |                              | 499              |
| T stage, n (%)                 | T2                           | 189 (38.4%)      |
|                                | T3                           | 292 (59.3%)      |
|                                | T4                           | 11 (2.2%)        |
| N stage, n (%)                 | N0                           | 347 (81.5%)      |
|                                | N1                           | 79 (18.5%)       |
| M stage, n (%)                 | M0                           | 455 (99.3%)      |
|                                | M1                           | 3 (0.7%)         |
| Race, n (%)                    | Asian                        | 12 (2.5%)        |
|                                | Black or African American    | 57 (11.8%)       |
|                                | White                        | 415 (85.7%)      |
| Primary therapy outcome, n (%) | PD                           | 28 (6.4%)        |
|                                | SD                           | 29 (6.6%)        |
|                                | PR                           | 40 (9.1%)        |
|                                | CR                           | 341 (77.9%)      |
| Age, n (%)                     | <=60                         | 224 (44.9%)      |
|                                | >60                          | 275 (55.1%)      |
| Residual tumor, n (%)          | R0                           | 315 (67.3%)      |
|                                | R1                           | 148 (31.6%)      |
|                                | R2                           | 5 (1.1%)         |
| Zone of origin, n (%)          | Central Zone                 | 4 (1.5%)         |
|                                | Overlapping / Multiple Zones | 126 (45.8%)      |
|                                | Peripheral Zone              | 137 (49.8%)      |
|                                | Transition Zone              | 8 (2.9%)         |
| PSA(ng/ml), n (%)              | <4                           | 415 (93.9%)      |
|                                | >=4                          | 27 (6.1%)        |
| Gleason score, n (%)           | 6                            | 46 (9.2%)        |
|                                | 7                            | 247 (49.5%)      |
|                                | 8                            | 64 (12.8%)       |
|                                | 9                            | 138 (27.7%)      |
|                                | 10                           | 4 (0.8%)         |
| Age, median (IQR)              |                              | 61 (56, 66)      |
| PSA(ng/ml), median (IQR)       |                              | 0.1 (0.03, 0.11) |
