# Supplementary material for: Crafting a Personalized Prognostic Model for Malignant Prostate Cancer Patients Using Risk Gene Signatures Discovered through TCGA-PRAD Mining, Machine Learning, and Single-Cell RNA-Sequencing
Source: Diagnostics (Basel). 2023 Jun 7;13(12):1997. doi: 10.3390/diagnostics13121997 (PMC10297172; doi:10.3390/diagnostics13121997)
Supplement: Supplementary file 1 [file diagnostics-13-01997-s001.zip]

Archive with 4 entries (4 files):
- Figure S1. Expression analysis of 5 risk factors in cellular subgroups of prostate cancer.pdf
- Table S1. Clinical Information of PCa Patients in TCGA-PRAD.pdf
- Table S2. Primer Sequences used for Real-time PCR.pdf
- Table S3. Research Progress on Risk Stratification and Treatment Outcome Assessment Models for Prostate Cancer.pdf
